# Supplementary material for: Treatment Sequencing Strategies in Advanced Neuroendocrine Tumors: A Review
Source: MDPI journal article supplement (doi:10.3390/cancers14215248), 2022-10-26
Supplement: s1 [file s1]

## SUPPLEMENT

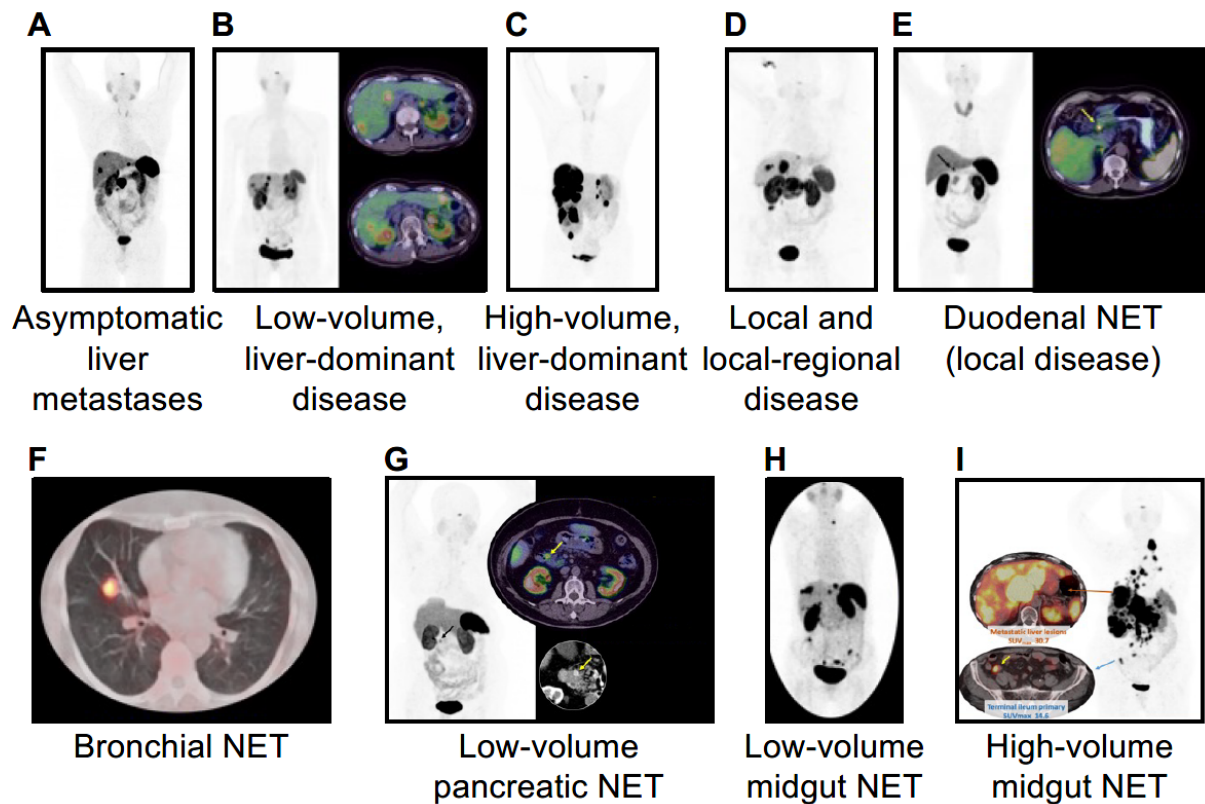

**Figure S1.** Images of common clinical scenarios encountered in the management of NETs. **A.**  $^{68}\text{Ga}$ -DOTATATE PET results (whole-body MIP) in a patient with asymptomatic, low-volume liver metastatic NET. Observation or somatostatin analogs could be considered in this patient. **B.**  $^{68}\text{Ga}$ -DOTATATE PET/CT results (left: whole-body MIP; right: cross-sectional CT) in a patient with low-volume, metastatic midgut NET and liver-dominant disease. This patient would be a candidate for loco-regional therapy. **C.**  $^{68}\text{Ga}$ -DOTATATE PET results (whole-body MIP) in a patient with high-volume metastatic NET and liver-dominant disease. This patient would be a candidate for PRRT. **D.**  $^{68}\text{Ga}$ -DOTATATE PET results (whole-body MIP) in a patient with low-volume metastatic midgut NET with liver-dominant disease. This patient would be a candidate for loco-regional therapy. **E.**  $^{68}\text{Ga}$ -DOTATATE PET/CT results (left: whole-body MIP; right: cross-sectional CT) in a patient with early-stage disease and a duodenal primary lesion (indicated by arrows). This patient would be an ideal candidate for surgical resection. **F.**  $^{68}\text{Ga}$ -DOTATATE PET/CT results (cross-sectional CT) in a patient with a bronchial NET. This patient would be a candidate for surgical resection of local disease. **G.**  $^{68}\text{Ga}$ -DOTATATE PET/CT results (left: whole-body MIP; right: cross-sectional CT) in a patient with a low-volume pancreatic NET (pancreatic head lesion indicated by arrows). **H.**  $^{68}\text{Ga}$ -DOTATATE PET results (whole-body MIP) in a patient with low-volume metastatic midgut NET including liver and peritoneal disease. **I.**  $^{68}\text{Ga}$ -DOTATATE PET/CT results (left: cross-sectional CT; right: whole-body MIP) in a patient with high-volume metastatic midgut NET and extensive liver metastases.  $^{68}\text{Ga}$ , gallium-68; CT, computed tomography; MIP, maximum intensity projection; NET, neuroendocrine tumor; PET, positron emission tomography; PRRT, peptide receptor radionuclide therapy;  $\text{SUV}_{\text{max}}$ , maximum standardized uptake value.
